# Supplementary material for: Exploring Intra- and Intermolecular Interactions in Selected N-Oxides—The Role of Hydrogen Bonds
Source: MDPI journal article supplement (doi:10.3390/molecules27030792), 2022-01-25
Supplement: s1 [file s1]

## SUPPLEMENTARY MATERIAL

### Exploring intra- and intermolecular interactions in selected *N*-oxides - the role of hydrogen bonds

Aneta Jezierska<sup>1\*</sup>, Jarosław J. Panek<sup>1</sup>, Kacper Błaziak<sup>2,3</sup>, Kamil Raczyński<sup>1</sup>  
and Aleksander Koll<sup>4</sup>

<sup>1</sup>University of Wrocław, Faculty of Chemistry, ul. F. Joliot-Curie 14, 50-383 Wrocław, Poland

<sup>2</sup>University of Warsaw, Faculty of Chemistry, ul. Pasteura 1, 01-224 Warsaw, Poland

<sup>3</sup> University of Warsaw, Biological and Chemical Research Center, Żwirki i Wigury 101, 01-224 Warsaw, Poland

<sup>4</sup>Non-public School of Medicine, ul. Nowowiejska 69, 50-340 Wrocław, Poland

Correspondence should be addressed to: aneta.jezierska@chem.uni.wroc.pl; Tel.: +48 71 3757 224; fax: +48 71 3282 348

#### Table of content:

- I. Figure S1.** The structures of the investigated *N*-oxides with atoms numbering scheme. BP indicates the bridged protons while the dotted line – the presence of intramolecular hydrogen bond. Coloring code: oxygen – red, nitrogen – blue, carbon – grey, hydrogen – white and bromine – pink.
- II. Table S1.** Interatomic distances of atoms involved in the intramolecular hydrogen bonds in **compound 1 (isolated molecule)**. Comparison between experimental (X-ray) [1] and computed at the DFT level of theory data. The 6-311++G(d,p) basis set was applied during the simulations. The data was obtained in the gas phase and with solvent reaction field using IEF-PCM model and water as a solvent. The interatomic distances are given in Å while valence angle is given in [°].
- III. Table S2.** Interatomic distances of atoms involved in the intramolecular hydrogen bonds in **compound 1 (monohydrate)**. Comparison between experimental (X-ray) [1] and computed at DFT level of theory data. The 6-311++G(d,p) basis set was applied during the simulations. The data was obtained in the gas phase and with solvent reaction field using IEF-PCM model and water as a solvent. The interatomic distances are given in Å while valence angle is given in [°].

- IV. Table S3.** Interatomic distances of atoms involved in the intramolecular hydrogen bonds in **compound 2**. Comparison between experimental (X-ray) [2] and computed at DFT level of theory data. The 6-311++G(d,p) basis set was applied during the simulations. The data was obtained in the gas phase and with solvent reaction field using IEF-PCM model and water as a solvent. The interatomic distances are given in Å while valence angle is given in [°].
- V. Table S4.** The energy of conformers of **1** and **2** computed at the B3LYP/6-311++G(d,p) and  $\omega$ B97XD/6-311++G(d,p) levels of theory. The values of energy are given in kcal/mol.
- VI. Figure S2.** The overlap of the X-ray (yellow) and optimized (red) structures of the dimers used in the SAPT study: (a) dimer 1 of the compound **1**, (b) dimer 2 of the compound **1** and (c) dimer 1 of the compound **2**.
- VII. Figure S3.** Microsolvation models of the compound **1** obtained at the  $\omega$ B97XD/6-311++G(d,p) level of theory.
- VIII. Table S5.** Metric parameters of the intra- and intermolecular hydrogen bonds obtained as a result of microsolvation of the compound **1**. The interatomic distances are given in Å while valence angle is given in [°].
- IX. MICROSOLVATION MODELS OF THE COMPOUND 1.**  
 Sets of coordinates obtained at the B3LYP/6-311++G(d,p) level of theory.  
 Sets of coordinates obtained at the  $\omega$ B97XD/6-311++G(d,p) level of theory.
- X. Figure S4.** Microsolvation models of the compound **2** obtained at the  $\omega$ B97XD/6-311++G(d,p) level of theory.
- XI. Table S6.** Metric parameters of the intra- and intermolecular hydrogen bonds obtained as a result of microsolvation of the compound **2** (B3LYP/6-311++G(d,p) level of theory). The interatomic distances are given in Å while valence angle is given in [°].
- XII. Table S7.** Metric parameters of the intra- and intermolecular hydrogen bonds obtained as a result of microsolvation of the compound **2** ( $\omega$ B97XD/6-311++G(d,p) level of theory). The interatomic distances are given in Å while valence angle is given in [°].
- XIII. MICROSOLVATION MODELS OF THE COMPOUND 2.**  
 Sets of coordinates obtained at the B3LYP/6-311++G(d,p) level of theory.  
 Sets of coordinates obtained at the  $\omega$ B97XD/6-311++G(d,p) level of theory.

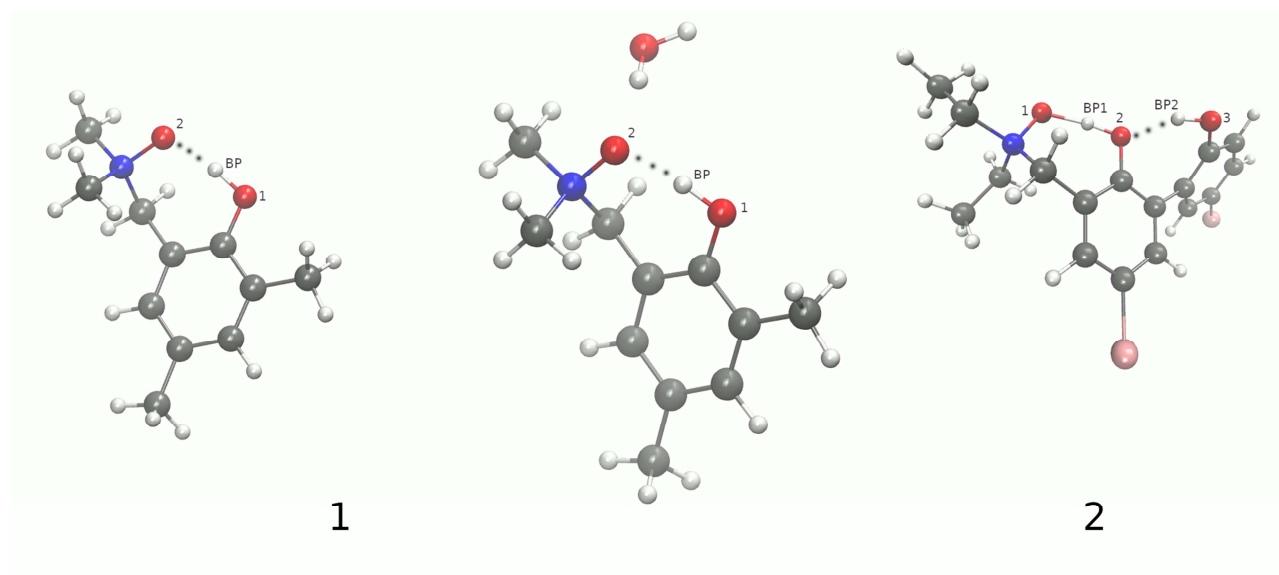

**Figure S1.** The structures of the investigated *N*-oxides with atoms numbering scheme. BP indicates the bridged protons while the dotted line – the presence of intramolecular hydrogen bond. Coloring code: oxygen – red, nitrogen – blue, carbon – grey, hydrogen – white and bromine – pink.

**Table S1.** Interatomic distances of atoms involved in the intramolecular hydrogen bonds in **compound 1 (isolated molecule)**. Comparison between experimental (X-ray) [1] and computed at the DFT level of theory data. The 6-311++G(d,p) basis set was applied during the simulations. The data was obtained in the gas phase and with solvent reaction field using IEF-PCM model and water as a solvent. The interatomic distances are given in Å while valence angle is given in [°].

| Metric parameters | Exp. X-ray [1] | Gas phase |           |        |        | Polarizable Continuum Model |           |        |        |
|-------------------|----------------|-----------|-----------|--------|--------|-----------------------------|-----------|--------|--------|
|                   |                | B3LYP     | CAM-B3LYP | M05-2X | ωB97XD | B3LYP                       | CAM-B3LYP | M05-2X | ωB97XD |
| O1...O2           | 2.541          | 2.5564    | 2.5427    | 2.5161 | 2.5608 | 2.5347                      | 2.5214    | 2.4854 | 2.5407 |
| O1-HBP            | 1.135          | 1.0171    | 1.0147    | 1.0246 | 1.0082 | 1.0239                      | 1.0213    | 1.0386 | 1.0132 |
| HBP...O2          | 1.458          | 1.5514    | 1.5421    | 1.5049 | 1.5664 | 1.5193                      | 1.5101    | 1.4557 | 1.5374 |
| <O1HBPO2          | 156.85         | 168.63    | 167.71    | 167.92 | 167.89 | 170.51                      | 169.64    | 170.15 | 169.71 |

\*the experimental data was recorded for the monohydrated form of the compound **1**. Therefore the X-ray values serve only as references for our quantum-mechanical simulations for the isolated molecule.

\*\*the Cambridge Crystallographic Data Center (CCDC) identifier for the **compound 1** is: SEHBEM with the database number: 593412.

**Table S2.** Interatomic distances of atoms involved in the intramolecular hydrogen bonds in **compound 1 (monohydrate)**. Comparison between experimental (X-ray) [1] and computed at DFT level of theory data. The 6-311++G(d,p) basis set was applied during the simulations. The data was obtained in the gas phase and with solvent reaction field using IEF-PCM model and water as a solvent. The interatomic distances are given in Å while valence angle is given in [°].

| Metric parameters            | Exp. X-ray [1] | Gas phase |           |        |        | Polarizable Continuum Model |           |        |        |
|------------------------------|----------------|-----------|-----------|--------|--------|-----------------------------|-----------|--------|--------|
|                              |                | B3LYP     | CAM-B3LYP | M05-2X | ωB97XD | B3LYP                       | CAM-B3LYP | M05-2X | ωB97XD |
| Intramolecular hydrogen bond |                |           |           |        |        |                             |           |        |        |
| O1...O2                      | 2.541          | 2.5882    | 2.5748    | 2.5541 | 2.5905 | 2.5694                      | 2.5553    | 2.5324 | 2.5787 |
| O1-HBP                       | 1.135          | 1.0073    | 1.0047    | 1.0099 | 0.9991 | 1.0097                      | 1.0068    | 1.0135 | 1.0013 |
| HBP...O2                     | 1.458          | 1.5894    | 1.5794    | 1.5533 | 1.6013 | 1.5717                      | 1.5625    | 1.5336 | 1.5874 |
| <O1HBPO2                     | 156.85         | 170.44    | 170.03    | 170.14 | 169.73 | 168.68                      | 167.73    | 167.41 | 169.67 |
| Intermolecular hydrogen bond |                |           |           |        |        |                             |           |        |        |
| O2...O                       | 2.718          | 2.7777    | 2.7348    | 2.7614 | 2.7498 | 2.7275                      | 2.6946    | 2.7189 | 2.7307 |
| O-H                          | 0.964          | 0.9816    | 0.9815    | 0.9755 | 0.9781 | 0.9866                      | 0.9866    | 0.9808 | 0.9814 |
| O2...H                       | 1.755          | 1.8227    | 1.7902    | 1.8317 | 1.8084 | 1.7427                      | 1.7085    | 1.7403 | 1.7500 |
| O2HO                         | 177.46         | 163.44    | 160.42    | 158.22 | 160.47 | 175.64                      | 177.66    | 175.10 | 177.32 |

\*\*the Cambridge Crystallographic Data Center (CCDC) identifier for the **compound 1** is: SEHBEM with the database number: 593412.

**Table S3.** Interatomic distances of atoms involved in the intramolecular hydrogen bonds in **compound 2**. Comparison between experimental (X-ray) [2] and computed at DFT level of theory data. The 6-311++G(d,p) basis set was applied during the simulations. The data was obtained in the gas phase and with solvent reaction field using IEF-PCM model and water as a solvent. The interatomic distances are given in Å while valence angle is given in [°].

| Metric parameters   | Exp. X-ray [2] | Gas phase |           |        |        | Polarizable Continuum Model |           |         |         |
|---------------------|----------------|-----------|-----------|--------|--------|-----------------------------|-----------|---------|---------|
|                     |                | B3LYP     | CAM-B3LYP | M05-2X | ωB97XD | B3LYP                       | CAM-B3LYP | M05-2X  | ωB97XD  |
| <b>O2...O1</b>      | 2.419          | 2.4559    | 2.4459    | 2.4215 | 2.4636 | 2.4695*                     | 2.4466*   | 2.4291* | 2.4729* |
| <b>O2-HBP1</b>      | 1.215          | 1.0663    | 1.0626    | 1.0946 | 1.0479 | 1.4152*                     | 1.3865*   | 1.3495* | 1.4344* |
| <b>HBP1...O1</b>    | 1.205          | 1.3952    | 1.3902    | 1.3318 | 1.4228 | 1.0565*                     | 1.0627*   | 1.0820* | 1.0425* |
| <b>&lt;O1HBP1O2</b> | 178.71         | 172.28    | 171.36    | 172.65 | 171.21 | 175.15*                     | 174.69*   | 174.83* | 173.36* |
| <b>O2...O3</b>      | 2.529          | 2.6363    | 2.6176    | 2.6309 | 2.6436 | 2.5444                      | 2.5306    | 2.5294  | 2.5509  |
| <b>O3-HBP2</b>      | 1.284          | 0.9791    | 0.9779    | 0.9755 | 0.9734 | 1.0025                      | 1.0008    | 1.0005  | 0.9953  |
| <b>HBP2...O2</b>    | 1.245          | 1.7195    | 1.7033    | 1.7201 | 1.7380 | 1.5741                      | 1.5637    | 1.5651  | 1.5907  |
| <b>&lt;O3HBP2O2</b> | 179.60         | 154.34    | 154.01    | 153.81 | 153.22 | 161.39                      | 160.85    | 160.23  | 160.59  |

\*indicates that the bridged proton moved to the acceptor side

\*\*the Cambridge Crystallographic Data Center (CCDC) identifier for the **compound 2** is: WUKMOE with the database number: 178615.

**Table S4.** The energy of conformers of **1** and **2** computed at the B3LYP/6-311++G(d,p) and  $\omega$ B97XD/6-311++G(d,p) levels of theory. The values of energy are given in kcal/mol.

| Level of theory                  | B3LYP/6-311++G(d,p) |                                                        | $\omega$ B97XD/6-311++G(d,p) |                                                        |
|----------------------------------|---------------------|--------------------------------------------------------|------------------------------|--------------------------------------------------------|
|                                  | Gas phase           | PCM                                                    | Gas phase                    | PCM                                                    |
| <b>Compound 1*</b>               |                     |                                                        |                              |                                                        |
| <b>A</b>                         | -398299.043         | -398309.856                                            | -398168,700                  | -398179,869                                            |
| <b>B</b>                         | ---                 | -398297.785                                            | ---                          | -398167,881                                            |
| <b>Compound 1 (monohydrate)*</b> |                     |                                                        |                              |                                                        |
| <b>A</b>                         | -446286.714         | -446299.528                                            | -446142.652                  | -446154.563                                            |
| <b>B</b>                         | -446273.171         | -446289.713                                            | ---                          | -446145.995                                            |
| <b>Compound 2</b>                |                     |                                                        |                              |                                                        |
| <b>A</b>                         | -3820383.622        | -3820396.998<br>(proton transfer to<br>the N→O moiety) | -3820229.650                 | -3820243.133<br>(proton transfer to<br>the N→O moiety) |
| <b>B</b>                         | -3820377.413        | -3820391.784                                           | -3820223.445                 | -3820238.145                                           |
| <b>C</b>                         | -3820362.620        | -3820380.499                                           | -3820208.319                 | -3820226.876                                           |

\*for the isolated molecule of **1** there was not found an open form in the gas phase for both functionals. The same holds for monohydrate form of the computed **1** computed at the  $\omega$ B97XD/6-311++G(d,p) level of theory in the gas phase.

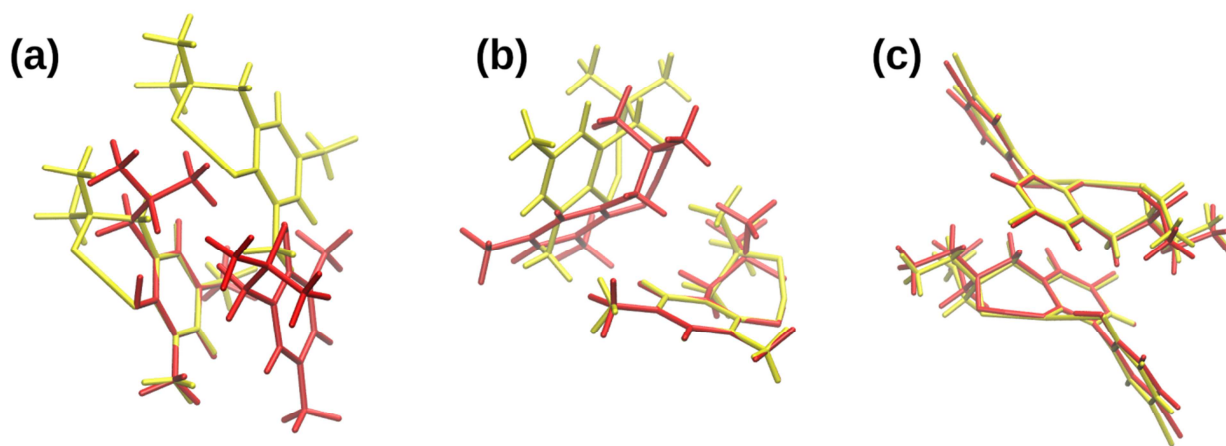

**Figure S2.** The overlap of the X-ray (yellow) and optimized (red) structures of the dimers used in the SAPT study: (a) dimer 1 of the compound **1**, (b) dimer 2 of the compound **1** and (c) dimer 1 of the compound **2**.



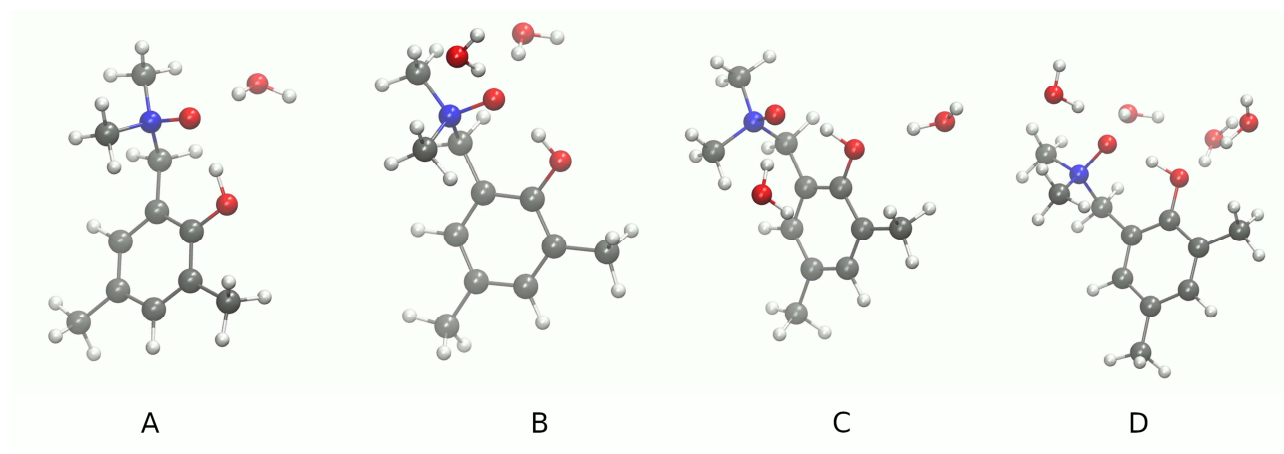

**Figure S3.** Microsolvation models of the compound **1** obtained at the  $\omega$ B97XD/6-311++G(d,p) level of theory.

**Table S5.** Metric parameters of the intra- and intermolecular hydrogen bonds obtained as a result of microsolvation of the compound **1**. The interatomic distances are given in Å while valence angle is given in [°].

| Compound 1           |                                                       |        |          |          |                      |        |          |          |
|----------------------|-------------------------------------------------------|--------|----------|----------|----------------------|--------|----------|----------|
|                      | B3LYP/6-311++G(d,p)                                   |        |          |          | ωB97XD/6-311++G(d,p) |        |          |          |
|                      | Model A                                               |        |          |          |                      |        |          |          |
|                      | Intramolecular hydrogen bond (interatomic distances)  |        |          |          |                      |        |          |          |
|                      | O1...O2                                               | O1-HBP | HBP...O2 | <O1HBPO2 | O1...O2              | O1-HBP | HBP...O2 | <O1HBPO2 |
|                      | 2.5882                                                | 1.0073 | 1.5894   | 170.44   | 2.5905               | 0.9991 | 1.6013   | 169.73   |
|                      | Intermolecular hydrogen bond (interatomic distances)  |        |          |          |                      |        |          |          |
|                      | O2...O                                                | O-H    | O2...H   | <O2HO    | O2...O               | O-H    | O2...H   | <O2HO    |
|                      | 2.7777                                                | 0.9816 | 1.8227   | 163.44   | 2.7498               | 0.9781 | 1.8084   | 160.47   |
|                      | Model B                                               |        |          |          |                      |        |          |          |
|                      | Intramolecular hydrogen bond (interatomic distances)  |        |          |          |                      |        |          |          |
|                      | O1...O2                                               | O1-HBP | HBP...O2 | <O1HBPO2 | O1...O2              | O1-HBP | HBP...O2 | <O1HBPO2 |
|                      | 2.6113                                                | 0.9994 | 1.6300   | 170.14   | 2.6089               | 0.9921 | 1.6284   | 168.91   |
|                      | Intermolecular hydrogen bonds (interatomic distances) |        |          |          |                      |        |          |          |
|                      | O2...O                                                | O-H    | O2...H   | <O2HO    | O2...O               | O-H    | O2...H   | <O2HO    |
| H <sub>2</sub> O (1) | 2.7629                                                | 0.9804 | 1.8273   | 158.49   | 2.7364               | 0.9768 | 1.8071   | 157.78   |
| H <sub>2</sub> O (2) | 2.8057                                                | 0.9787 | 1.8592   | 161.83   | 2.7781               | 0.9749 | 1.8370   | 161.32   |

**Table S5 (Continuation).** Metric parameters of the intra- and intermolecular hydrogen bonds obtained as a result of microsolvation of the compound **1**. The interatomic distances are given in Å while valence angle is given in [°].

| Compound 1           |                                                       |        |          |          |                      |        |          |          |
|----------------------|-------------------------------------------------------|--------|----------|----------|----------------------|--------|----------|----------|
|                      | B3LYP/6-311++G(d,p)                                   |        |          |          | ωB97XD/6-311++G(d,p) |        |          |          |
|                      | Model C                                               |        |          |          |                      |        |          |          |
|                      | Intramolecular hydrogen bond (interatomic distances)  |        |          |          |                      |        |          |          |
|                      | O1...O2                                               | O1-HBP | HBP...O2 | <O1HBPO2 | O1...O2              | O1-HBP | HBP...O2 | <O1HBPO2 |
|                      | 2.4734                                                | 1.0544 | 1.4261   | 171.23   | 2.5573               | 1.0040 | 1.5880   | 160.73   |
|                      | Intermolecular hydrogen bonds (interatomic distances) |        |          |          |                      |        |          |          |
|                      | O1...O                                                | O-H    | O1...H   | <O1HO    | O2...O               | O-H    | O2...H   | <O2HO    |
| H <sub>2</sub> O     | 2.7676                                                | 0.9814 | 1.7995   | 168.26   | 2.8700               | 0.9722 | 1.9088   | 165.69   |
|                      | ---                                                   | ---    | ---      | ---      | O1...O               | O-H    | O1...H   | <O1HO    |
|                      | ---                                                   | ---    | ---      | ---      | 2.8307               | 0.9682 | 1.8668   | 173.32   |
|                      | Model D                                               |        |          |          |                      |        |          |          |
|                      | B3LYP/6-311++G(d,p)                                   |        |          |          | ωB97XD/6-311++G(d,p) |        |          |          |
|                      | Intramolecular hydrogen bond (interatomic distances)  |        |          |          |                      |        |          |          |
|                      | O1...O2                                               | O1-HBP | HBP...O2 | <O1HBPO2 | O1...O2              | O1-HBP | HBP...O2 | <O1HBPO2 |
|                      | 2.5448                                                | 1.0206 | 1.5307   | 171.65   | 2.5328               | 1.0143 | 1.5267   | 170.58   |
|                      | Intermolecular hydrogen bonds (interatomic distances) |        |          |          |                      |        |          |          |
|                      | O2...O                                                | O-H    | O2...H   | <O2HO    | O2...O               | O-H    | O2...H   | <O2HO    |
| H <sub>2</sub> O (1) | 2.7604                                                | 0.9805 | 1.8211   | 159.37   | 2.7412               | 0.9759 | 1.8114   | 158.09   |
| H <sub>2</sub> O (2) | 2.9436                                                | 0.9692 | 2.0813   | 147.26   | 2.8951               | 0.9665 | 2.0071   | 151.79   |
|                      | O1...O                                                | O-H    | O1...H   | <O1HO    | O1...O               | O-H    | O1...H   | <O1HO    |
| H <sub>2</sub> O (1) | 2.7903                                                | 0.9792 | 1.8128   | 175.92   | 2.8290               | 0.9683 | 1.9147   | 156.47   |
| H <sub>2</sub> O (2) | ---                                                   | ---    | ---      | ---      | 2.9572               | 0.9636 | 2.1026   | 146.93   |

## MICROSOLVATION MODELS OF THE COMPOUND 1

Sets of coordinates obtained at the B3LYP/6-311++G(d,p) level of theory

### Compound 1

#### Model A - monohydrated form

34

scf done: -711.203686

|   |           |          |           |
|---|-----------|----------|-----------|
| O | 16.387287 | 1.562442 | 1.413093  |
| O | 17.733176 | 2.005451 | 3.578938  |
| N | 17.074276 | 3.065476 | 4.195723  |
| C | 15.250822 | 2.261370 | 1.603347  |
| C | 15.173909 | 3.364542 | 2.474735  |
| C | 13.942928 | 4.019110 | 2.641267  |
| C | 12.799343 | 3.630304 | 1.953804  |
| C | 12.915976 | 2.548890 | 1.068650  |
| C | 14.108398 | 1.860460 | 0.877235  |
| C | 16.393874 | 3.946061 | 3.136386  |
| C | 18.088478 | 3.892966 | 4.930163  |
| C | 16.081107 | 2.509435 | 5.165402  |
| C | 11.481362 | 4.345423 | 2.135749  |
| C | 14.214358 | 0.698428 | -0.074515 |
| H | 16.988827 | 1.684023 | 2.211849  |
| H | 13.893228 | 4.872345 | 3.312839  |
| H | 12.040099 | 2.228349 | 0.510597  |
| H | 16.129216 | 4.882656 | 3.630640  |
| H | 17.197225 | 4.137075 | 2.422521  |
| H | 18.780123 | 4.308463 | 4.200623  |
| H | 18.624291 | 3.221716 | 5.597471  |
| H | 17.586787 | 4.682309 | 5.492355  |
| H | 15.387153 | 1.883622 | 4.612151  |
| H | 16.635964 | 1.909916 | 5.883189  |
| H | 15.547386 | 3.322558 | 5.660925  |
| H | 10.704216 | 3.666917 | 2.502329  |
| H | 11.121892 | 4.768632 | 1.192333  |
| H | 11.570649 | 5.164653 | 2.852804  |
| H | 14.946932 | 0.899420 | -0.861781 |

|   |           |           |           |
|---|-----------|-----------|-----------|
| H | 13.250806 | 0.489050  | -0.543232 |
| H | 14.557482 | -0.202231 | 0.442293  |
| O | 20.008108 | 3.181740  | 2.503488  |
| H | 19.280948 | 2.607789  | 2.828091  |
| H | 20.317376 | 2.780940  | 1.686637  |

## Model B

37

scf done: -787.676848

|   |           |          |           |
|---|-----------|----------|-----------|
| O | 16.350714 | 1.517713 | 1.375271  |
| O | 17.696746 | 1.874759 | 3.584199  |
| N | 17.048042 | 2.936876 | 4.227393  |
| C | 15.234474 | 2.252054 | 1.576499  |
| C | 15.187226 | 3.331235 | 2.478336  |
| C | 13.976874 | 4.021895 | 2.649958  |
| C | 12.828609 | 3.691384 | 1.939988  |
| C | 12.918122 | 2.631932 | 1.026218  |
| C | 14.088936 | 1.908596 | 0.828459  |
| C | 16.416871 | 3.855141 | 3.171052  |
| C | 18.071724 | 3.718585 | 5.002084  |
| C | 16.017746 | 2.384051 | 5.164167  |
| C | 11.532418 | 4.442473 | 2.132428  |
| C | 14.165184 | 0.768665 | -0.152614 |
| H | 16.942220 | 1.594388 | 2.177195  |
| H | 13.947796 | 4.856865 | 3.344955  |
| H | 12.038367 | 2.356474 | 0.450648  |
| H | 16.174851 | 4.787608 | 3.683446  |
| H | 17.238220 | 4.039188 | 2.476169  |
| H | 18.784644 | 4.133738 | 4.292893  |
| H | 18.569772 | 3.021465 | 5.672659  |
| H | 17.573317 | 4.510146 | 5.563398  |
| H | 15.323052 | 1.785805 | 4.581679  |
| H | 16.535194 | 1.763914 | 5.892614  |
| H | 15.491811 | 3.207779 | 5.649440  |
| H | 10.743290 | 3.787464 | 2.516027  |

|   |           |           |           |
|---|-----------|-----------|-----------|
| H | 11.171379 | 4.865526  | 1.189798  |
| H | 11.652395 | 5.265433  | 2.840574  |
| H | 14.912836 | 0.963562  | -0.927093 |
| H | 13.200148 | 0.605844  | -0.636260 |
| H | 14.469776 | -0.156906 | 0.343960  |
| H | 19.154754 | 2.577297  | 2.669204  |
| O | 19.796400 | 3.210696  | 2.288563  |
| H | 20.009951 | 2.876443  | 1.412893  |
| H | 18.385726 | 0.797781  | 4.889764  |
| O | 18.610221 | 0.488161  | 5.792516  |
| H | 19.243214 | -0.226806 | 5.687024  |

### Model C

37

scf done: -787.676234

|   |           |          |          |
|---|-----------|----------|----------|
| O | 15.635515 | 0.765330 | 1.915398 |
| O | 16.856615 | 1.367923 | 3.980263 |
| N | 16.844051 | 2.753160 | 4.091964 |
| C | 14.684906 | 1.731577 | 1.871810 |
| C | 14.943293 | 3.017120 | 2.380445 |
| C | 13.924737 | 3.979034 | 2.353743 |
| C | 12.668695 | 3.704521 | 1.819933 |
| C | 12.453945 | 2.424082 | 1.293460 |
| C | 13.431724 | 1.432466 | 1.305502 |
| C | 16.333931 | 3.409002 | 2.804286 |
| C | 18.254453 | 3.207247 | 4.323455 |
| C | 15.981216 | 3.121138 | 5.256169 |
| C | 11.572524 | 4.743873 | 1.800479 |
| C | 13.179895 | 0.059046 | 0.740828 |
| H | 16.214633 | 0.952819 | 2.776393 |
| H | 14.132519 | 4.973640 | 2.739493 |
| H | 11.484349 | 2.187548 | 0.863004 |
| H | 16.387657 | 4.487787 | 2.965317 |
| H | 17.077845 | 3.134982 | 2.054251 |
| H | 18.833815 | 2.934649 | 3.443544 |

|   |           |           |           |
|---|-----------|-----------|-----------|
| H | 18.619383 | 2.675365  | 5.199201  |
| H | 18.278290 | 4.286961  | 4.486011  |
| H | 14.975722 | 2.765178  | 5.047723  |
| H | 16.383176 | 2.609039  | 6.127302  |
| H | 15.985227 | 4.203265  | 5.402097  |
| H | 10.727532 | 4.446488  | 2.430469  |
| H | 11.183460 | 4.896711  | 0.789106  |
| H | 11.933742 | 5.707736  | 2.166226  |
| H | 13.842105 | -0.149614 | -0.105179 |
| H | 12.147826 | -0.038651 | 0.398365  |
| H | 13.376710 | -0.713780 | 1.488907  |
| H | 18.696736 | 1.800480  | 0.643160  |
| O | 19.091153 | 2.618750  | 1.011101  |
| H | 19.516577 | 3.053242  | 0.266632  |
| H | 16.876740 | 0.465564  | 0.647464  |
| O | 17.674044 | 0.406197  | 0.078296  |
| H | 17.995521 | -0.494795 | 0.177279  |

#### Model D

43

scf done: -940.624219

|   |           |          |          |
|---|-----------|----------|----------|
| O | 15.903728 | 1.102981 | 1.793657 |
| O | 17.359271 | 1.661106 | 3.805113 |
| N | 16.921475 | 2.914034 | 4.256215 |
| C | 14.873904 | 1.989802 | 1.882799 |
| C | 15.016827 | 3.219153 | 2.548315 |
| C | 13.908278 | 4.074081 | 2.633143 |
| C | 12.680955 | 3.754205 | 2.061799 |
| C | 12.581451 | 2.530600 | 1.388388 |
| C | 13.647615 | 1.641171 | 1.286660 |
| C | 16.344250 | 3.701592 | 3.074460 |
| C | 18.107925 | 3.659558 | 4.802040 |
| C | 15.905993 | 2.717303 | 5.339985 |
| C | 11.499432 | 4.691014 | 2.146898 |
| C | 13.511880 | 0.325414 | 0.565172 |
| H | 16.542065 | 1.261317 | 2.574091 |

|   |           |           |           |
|---|-----------|-----------|-----------|
| H | 14.022206 | 5.025070  | 3.146171  |
| H | 11.634711 | 2.254753  | 0.931945  |
| H | 16.246561 | 4.733713  | 3.414333  |
| H | 17.137173 | 3.650195  | 2.325456  |
| H | 18.804820 | 3.825066  | 3.983163  |
| H | 18.557249 | 3.028813  | 5.566327  |
| H | 17.771669 | 4.605341  | 5.229515  |
| H | 15.083183 | 2.138465  | 4.930047  |
| H | 16.388556 | 2.170846  | 6.147130  |
| H | 15.550355 | 3.690743  | 5.681642  |
| H | 10.622101 | 4.190236  | 2.567450  |
| H | 11.215762 | 5.065661  | 1.158067  |
| H | 11.722717 | 5.555303  | 2.776138  |
| H | 14.158070 | 0.287052  | -0.317334 |
| H | 12.482692 | 0.167386  | 0.238002  |
| H | 13.804332 | -0.508181 | 1.209808  |
| H | 18.925702 | 2.122090  | 2.514511  |
| O | 19.388024 | 2.804462  | 2.004637  |
| H | 19.595726 | 2.396869  | 1.143758  |
| H | 17.984833 | 0.742456  | 5.247676  |
| O | 18.220327 | 0.546295  | 6.179069  |
| H | 18.838011 | -0.189245 | 6.154795  |
| H | 19.810830 | 1.973367  | -1.322295 |
| O | 19.676492 | 1.483694  | -0.506072 |
| H | 18.814589 | 1.028568  | -0.603098 |
| H | 16.702010 | 0.531994  | 0.269554  |
| O | 17.194580 | 0.236420  | -0.523380 |
| H | 17.173424 | -0.724893 | -0.500807 |



## Sets of coordinates obtained at the $\omega$ B97XD/6-311++G(d,p) level of theory

### Compound 1

#### Model A - monohydrated form

34

scf done: -710.974108

|   |           |          |           |
|---|-----------|----------|-----------|
| O | 16.416340 | 1.561935 | 1.409566  |
| O | 17.715482 | 1.950463 | 3.616781  |
| N | 17.069178 | 3.015260 | 4.208963  |
| C | 15.292941 | 2.270252 | 1.604643  |
| C | 15.232650 | 3.369349 | 2.471982  |
| C | 14.014840 | 4.034436 | 2.648516  |
| C | 12.866557 | 3.657787 | 1.971611  |
| C | 12.964790 | 2.579055 | 1.087851  |
| C | 14.145363 | 1.881201 | 0.890293  |
| C | 16.458792 | 3.914402 | 3.146616  |
| C | 18.069203 | 3.804716 | 4.982313  |
| C | 16.028467 | 2.486721 | 5.127535  |
| C | 11.557782 | 4.378683 | 2.166893  |
| C | 14.237141 | 0.716708 | -0.054166 |
| H | 16.996978 | 1.648568 | 2.217993  |
| H | 13.977332 | 4.885476 | 3.324642  |
| H | 12.079960 | 2.267568 | 0.537992  |
| H | 16.216129 | 4.861169 | 3.633916  |
| H | 17.279690 | 4.078771 | 2.445003  |
| H | 18.780363 | 4.233320 | 4.278120  |
| H | 18.581824 | 3.109269 | 5.643471  |
| H | 17.564388 | 4.586012 | 5.553239  |
| H | 15.353974 | 1.864258 | 4.545723  |
| H | 16.537246 | 1.887577 | 5.879461  |
| H | 15.481008 | 3.313132 | 5.585403  |
| H | 10.806645 | 3.720972 | 2.614817  |
| H | 11.155659 | 4.734327 | 1.214096  |
| H | 11.676807 | 5.244128 | 2.822565  |
| H | 14.960959 | 0.913977 | -0.849498 |
| H | 13.267977 | 0.505256 | -0.509926 |

|   |           |           |          |
|---|-----------|-----------|----------|
| H | 14.585068 | -0.178312 | 0.468048 |
| O | 19.741548 | 3.300763  | 2.338933 |
| H | 19.136684 | 2.645509  | 2.740748 |
| H | 19.964237 | 2.957591  | 1.473957 |

## Model B

37

scf done: -787.424895

|   |           |          |           |
|---|-----------|----------|-----------|
| O | 16.404105 | 1.570174 | 1.331179  |
| O | 17.663550 | 1.859133 | 3.597610  |
| N | 17.045210 | 2.935513 | 4.214136  |
| C | 15.281429 | 2.277720 | 1.554432  |
| C | 15.229736 | 3.341412 | 2.464013  |
| C | 14.016166 | 4.007505 | 2.665453  |
| C | 12.866656 | 3.665227 | 1.972607  |
| C | 12.958350 | 2.621731 | 1.047106  |
| C | 14.134516 | 1.923773 | 0.823288  |
| C | 16.459426 | 3.854201 | 3.157435  |
| C | 18.070790 | 3.691119 | 4.992679  |
| C | 15.989093 | 2.426603 | 5.131326  |
| C | 11.562630 | 4.387465 | 2.192063  |
| C | 14.217961 | 0.796625 | -0.166377 |
| H | 16.967253 | 1.609223 | 2.147000  |
| H | 13.983982 | 4.831530 | 3.374186  |
| H | 12.072695 | 2.338448 | 0.483668  |
| H | 16.228406 | 4.795375 | 3.660121  |
| H | 17.287546 | 4.020129 | 2.465079  |
| H | 18.798012 | 4.091398 | 4.288045  |
| H | 18.547477 | 2.984457 | 5.669902  |
| H | 17.583531 | 4.494205 | 5.547704  |
| H | 15.303502 | 1.820816 | 4.544538  |
| H | 16.476989 | 1.820156 | 5.892181  |
| H | 15.460282 | 3.271485 | 5.576136  |
| H | 10.790866 | 3.706596 | 2.563261  |
| H | 11.191882 | 4.826320 | 1.261302  |

|   |           |           |           |
|---|-----------|-----------|-----------|
| H | 11.673715 | 5.194095  | 2.919965  |
| H | 14.948711 | 1.016890  | -0.949197 |
| H | 13.248762 | 0.617270  | -0.635440 |
| H | 14.550029 | -0.123681 | 0.320993  |
| H | 19.087372 | 2.543433  | 2.659987  |
| O | 19.691360 | 3.176114  | 2.229538  |
| H | 19.764860 | 2.885062  | 1.320581  |
| H | 18.301382 | 0.812344  | 4.925389  |
| O | 18.505239 | 0.535017  | 5.839563  |
| H | 19.139553 | -0.177661 | 5.774052  |

### Model C

37

scf done: -787.417341

|   |           |          |           |
|---|-----------|----------|-----------|
| O | 16.580729 | 1.744942 | 1.071822  |
| O | 17.368202 | 1.584912 | 3.499570  |
| N | 17.057584 | 2.780355 | 4.107502  |
| C | 15.381019 | 2.303386 | 1.364325  |
| C | 15.257372 | 3.244306 | 2.391038  |
| C | 13.999212 | 3.767733 | 2.690931  |
| C | 12.867670 | 3.384720 | 1.986039  |
| C | 13.030128 | 2.466833 | 0.945763  |
| C | 14.262224 | 1.918048 | 0.614215  |
| C | 16.479828 | 3.750176 | 3.095823  |
| C | 18.313051 | 3.354318 | 4.659525  |
| C | 16.087299 | 2.539301 | 5.212270  |
| C | 11.504522 | 3.930229 | 2.323455  |
| C | 14.425590 | 0.933399 | -0.509273 |
| H | 17.075224 | 1.647003 | 1.940037  |
| H | 13.909861 | 4.500668 | 3.488814  |
| H | 12.158270 | 2.162957 | 0.372171  |
| H | 16.264287 | 4.681064 | 3.624895  |
| H | 17.289162 | 3.926189 | 2.383996  |
| H | 19.005782 | 3.488733 | 3.831473  |
| H | 18.720613 | 2.628322 | 5.359335  |

|   |           |           |           |
|---|-----------|-----------|-----------|
| H | 18.108716 | 4.304553  | 5.156799  |
| H | 15.188615 | 2.098044  | 4.787476  |
| H | 16.548629 | 1.827840  | 5.893958  |
| H | 15.866421 | 3.480794  | 5.718751  |
| H | 10.865788 | 3.152202  | 2.752204  |
| H | 11.000965 | 4.315096  | 1.432749  |
| H | 11.571046 | 4.743582  | 3.049151  |
| H | 15.064456 | 1.346312  | -1.295267 |
| H | 13.458404 | 0.677066  | -0.944983 |
| H | 14.906402 | 0.016896  | -0.156556 |
| H | 17.330080 | 2.060069  | -0.608666 |
| O | 17.620139 | 2.270750  | -1.508086 |
| H | 18.064163 | 1.480666  | -1.815250 |
| H | 14.590217 | 0.163893  | 2.865777  |
| O | 15.055633 | -0.091358 | 3.664493  |
| H | 15.922963 | 0.341081  | 3.587621  |

#### Model D

43

scf done: -940.321227

|   |           |          |          |
|---|-----------|----------|----------|
| O | 16.172074 | 1.350472 | 1.551886 |
| O | 17.413468 | 1.719601 | 3.728504 |
| N | 16.968753 | 2.936857 | 4.223313 |
| C | 15.083857 | 2.149023 | 1.703917 |
| C | 15.147884 | 3.309096 | 2.481147 |
| C | 13.997458 | 4.088172 | 2.626190 |
| C | 12.804714 | 3.754881 | 2.002117 |
| C | 12.786599 | 2.605167 | 1.209786 |
| C | 13.899992 | 1.792890 | 1.046205 |
| C | 16.441024 | 3.784931 | 3.083262 |
| C | 18.124166 | 3.645222 | 4.850821 |
| C | 15.913803 | 2.686512 | 5.243352 |
| C | 11.567405 | 4.600287 | 2.157379 |
| C | 13.864414 | 0.553079 | 0.197900 |
| H | 16.734501 | 1.428945 | 2.392300 |

|   |           |           |           |
|---|-----------|-----------|-----------|
| H | 14.048776 | 4.990479  | 3.230033  |
| H | 11.865360 | 2.328739  | 0.703536  |
| H | 16.311595 | 4.793425  | 3.480123  |
| H | 17.261004 | 3.794766  | 2.360968  |
| H | 18.852596 | 3.852166  | 4.068176  |
| H | 18.542078 | 2.975083  | 5.600001  |
| H | 17.770599 | 4.568962  | 5.311445  |
| H | 15.123565 | 2.108737  | 4.770769  |
| H | 16.366859 | 2.119021  | 6.054084  |
| H | 15.523578 | 3.641281  | 5.600290  |
| H | 10.754663 | 4.029134  | 2.615267  |
| H | 11.210896 | 4.958561  | 1.187642  |
| H | 11.758722 | 5.472381  | 2.785957  |
| H | 14.605276 | 0.595951  | -0.604922 |
| H | 12.879538 | 0.418461  | -0.251962 |
| H | 14.094144 | -0.334967 | 0.793787  |
| H | 18.998789 | 2.193394  | 2.592408  |
| O | 19.515658 | 2.822158  | 2.071262  |
| H | 19.352587 | 2.560721  | 1.151758  |
| H | 17.993343 | 0.759049  | 5.150614  |
| O | 18.190644 | 0.552055  | 6.083717  |
| H | 18.896163 | -0.093756 | 6.076125  |
| H | 17.485419 | 2.038354  | 0.061003  |
| O | 18.340635 | 1.936853  | -0.371264 |
| H | 18.357340 | 0.989083  | -0.555350 |
| H | 16.682685 | -0.189535 | 0.535188  |
| O | 17.193110 | -0.695873 | -0.113459 |
| H | 17.436017 | -1.513950 | 0.319666  |

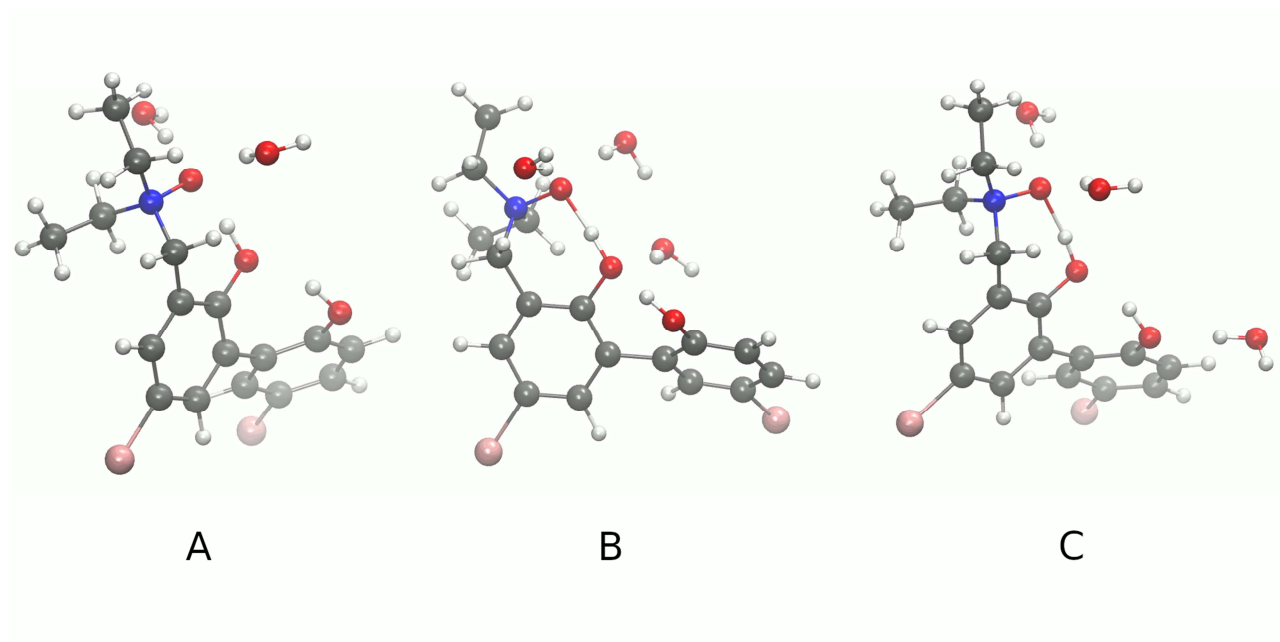

**Figure S4.** Microsolvation models of the compound **2** obtained at the  $\omega$ B97XD/6-311++G(d,p) level of theory.

**Table S6.** Metric parameters of the intra- and intermolecular hydrogen bonds obtained as a result of microsolvation of the compound **2** (B3LYP/6-311++G(d,p) level of theory).. The interatomic distances are given in Å while valence angle is given in [°].

| Compound 2                                            |         |         |           |           |         |         |           |           |
|-------------------------------------------------------|---------|---------|-----------|-----------|---------|---------|-----------|-----------|
| B3LYP/6-311++G(d,p)                                   |         |         |           |           |         |         |           |           |
| Model A                                               |         |         |           |           |         |         |           |           |
| Intramolecular hydrogen bond (interatomic distances)  |         |         |           |           |         |         |           |           |
|                                                       | O2...O1 | O2-HBP1 | HBP1...O2 | <O2HBP1O1 | O3...O2 | O3-HBP2 | HBP2...O2 | <O3HBP2O2 |
|                                                       | 2.5266  | 1.0231  | 1.5089    | 172.34    | 2.6616  | 0.9752  | 1.7595    | 152.24    |
| Intermolecular hydrogen bonds (interatomic distances) |         |         |           |           |         |         |           |           |
|                                                       | O1...O  | O-H     | O1...H    | <O1HO     | ---     | ---     | ---       | ---       |
| H <sub>2</sub> O (1)                                  | 2.8106  | 0.9767  | 1.8511    | 166.70    | ---     | ---     | ---       | ---       |
| H <sub>2</sub> O (2)                                  | 2.8175  | 0.9758  | 1.9020    | 155.17    | ---     | ---     | ---       | ---       |
| Model B                                               |         |         |           |           |         |         |           |           |
| Intramolecular hydrogen bond (interatomic distances)  |         |         |           |           |         |         |           |           |
|                                                       | O2...O1 | O2-HBP1 | HBP1...O2 | <O2HBP1O1 | O3...O2 | O3-HBP2 | HBP2...O2 | <O3HBP2O2 |
|                                                       | 2.4757  | 1.0516  | 1.4273    | 174.08    | 2.6820  | 0.9745  | 1.7893    | 150.72    |
| Intermolecular hydrogen bonds (interatomic distances) |         |         |           |           |         |         |           |           |
|                                                       | O1...O  | O-H     | O1...H    | <O1HO     | O2...O  | O-H     | O2...H    | <O2HO     |
| H <sub>2</sub> O (1)                                  | 2.8071  | 0.9757  | 1.8972    | 154.04    | 2.9532  | 0.9696  | 2.0396    | 156.28    |
| H <sub>2</sub> O (2)                                  | 2.9302  | 0.9693  | 1.9894    | 163.02    | ---     | ---     | ---       | ---       |

**Table S6 (Continuation).** Metric parameters of the intra- and intermolecular hydrogen bonds obtained as a result of microsolvation of the compound **2** (B3LYP/6-311++G(d,p) level of theory). The interatomic distances are given in Å while valence angle is given in [°].

| Compound 2           |                                                       |         |           |           |         |         |           |           |
|----------------------|-------------------------------------------------------|---------|-----------|-----------|---------|---------|-----------|-----------|
|                      | B3LYP/6-311++G(d,p)                                   |         |           |           |         |         |           |           |
|                      | Intramolecular hydrogen bond (interatomic distances)  |         |           |           |         |         |           |           |
|                      | O2...O1                                               | O2-HBP1 | HBP1...O2 | <O2HBP1O1 | O3...O2 | O3-HBP2 | HBP2...O2 | <O3HBP2O2 |
|                      | 2.5147                                                | 1.0278  | 1.4919    | 172.66    | 2.6272  | 0.9796  | 1.7183    | 152.63    |
|                      | Intermolecular hydrogen bonds (interatomic distances) |         |           |           |         |         |           |           |
|                      | O1...O                                                | O-H     | O1...H    | <O1HO     | O3...O  | O-H     | O3...H    | <O3HO     |
| H <sub>2</sub> O (1) | 2.8151                                                | 0.9762  | 1.8588    | 165.71    | 2.8813  | 0.9707  | 1.9182    | 171.21    |
| H <sub>2</sub> O (2) | 2.8215                                                | 0.9752  | 1.9118    | 154.12    | ---     | ---     | ---       | ---       |



**Table S7.** Metric parameters of the intra- and intermolecular hydrogen bonds obtained as a result of microsolvation of the compound **2** ( $\omega$ B97XD/6-311++G(d,p) level of theory). The interatomic distances are given in Å while valence angle is given in [°].

| Compound 2                                            |         |         |           |           |         |         |           |           |
|-------------------------------------------------------|---------|---------|-----------|-----------|---------|---------|-----------|-----------|
| $\omega$ B97XD/6-311++G(d,p)                          |         |         |           |           |         |         |           |           |
| Model A                                               |         |         |           |           |         |         |           |           |
| Intramolecular hydrogen bond (interatomic distances)  |         |         |           |           |         |         |           |           |
|                                                       | O2...O1 | O2-HBP1 | HBP1...O2 | <O2HBP1O1 | O3...O2 | O3-HBP2 | HBP2...O2 | <O3HBP2O2 |
|                                                       | 2.5276  | 1.0122  | 1.5227    | 171.10    | 2.6666  | 0.9702  | 1.7750    | 151.22    |
| Intermolecular hydrogen bonds (interatomic distances) |         |         |           |           |         |         |           |           |
|                                                       | O1...O  | O-H     | O1...H    | <O1HO     | ---     | ---     | ---       | ---       |
| H <sub>2</sub> O (1)                                  | 2.7723  | 0.9727  | 1.8613    | 154.72    | ---     | ---     | ---       | ---       |
| H <sub>2</sub> O (2)                                  | 2.7745  | 0.9737  | 1.8193    | 166.16    | ---     | ---     | ---       | ---       |
| Model B                                               |         |         |           |           |         |         |           |           |
| Intramolecular hydrogen bond (interatomic distances)  |         |         |           |           |         |         |           |           |
|                                                       | O2...O1 | O2-HBP1 | HBP1...O2 | <O2HBP1O1 | O3...O2 | O3-HBP2 | HBP2...O2 | <O3HBP2O2 |
|                                                       | 2.4686  | 1.0393  | 1.4350    | 172.15    | 2.6833  | 0.9696  | 1.8068    | 148.76    |
| Intermolecular hydrogen bonds (interatomic distances) |         |         |           |           |         |         |           |           |
|                                                       | O1...O  | O-H     | O1...H    | <O1HO     | O2...O  | O-H     | O2...H    | <O2HO     |
| H <sub>2</sub> O (1)                                  | 2.7619  | 0.9730  | 1.8548    | 153.89    | 2.8799  | 0.9661  | 1.9907    | 152.04    |
| H <sub>2</sub> O (2)                                  | 2.8809  | 0.9666  | 1.9434    | 162.78    | ---     | ---     | ---       | ---       |

**Table S7 (Continuation).** Metric parameters of the intra- and intermolecular hydrogen bonds obtained as a result of microsolvation of the compound **2** ( $\omega$ B97XD/6-311++G(d,p) level of theory). The interatomic distances are given in Å while valence angle is given in [°].

| Compound 2           |                                                       |         |           |           |         |         |           |           |
|----------------------|-------------------------------------------------------|---------|-----------|-----------|---------|---------|-----------|-----------|
|                      | $\omega$ B97XD/6-311++G(d,p)                          |         |           |           |         |         |           |           |
|                      | Model C                                               |         |           |           |         |         |           |           |
|                      | Intramolecular hydrogen bond (interatomic distances)  |         |           |           |         |         |           |           |
|                      | O2...O1                                               | O2-HBP1 | HBP1...O2 | <O2HBP1O1 | O3...O2 | O3-HBP2 | HBP2...O2 | <O3HBP2O2 |
|                      | 2.5170                                                | 1.0159  | 1.5080    | 171.39    | 2.6285  | 0.9743  | 1.7307    | 151.52    |
|                      | Intermolecular hydrogen bonds (interatomic distances) |         |           |           |         |         |           |           |
|                      | O1...O                                                | O-H     | O1...H    | <O1HO     | O3...O2 | O3-HBP2 | HBP2...O2 | <O3HBP2O2 |
| H <sub>2</sub> O (1) | 2.7750                                                | 0.9724  | 1.8693    | 153.77    | 2.8524  | 0.9670  | 1.8983    | 168.45    |
| H <sub>2</sub> O (2) | 2.7768                                                | 0.9733  | 1.8237    | 165.54    |         |         |           |           |

## MICROSOLVATION MODELS OF THE COMPOUND 2

Sets of coordinates obtained at the B3LYP/6-311++G(d,p) level of theory

### Compound 2

#### Model A

48

scf done: -6241.115307

|    |           |           |           |
|----|-----------|-----------|-----------|
| Br | 3.957661  | 2.217929  | -4.649697 |
| Br | 6.575341  | 7.256155  | 0.406954  |
| O  | 9.112137  | 1.189110  | -1.625247 |
| O  | 10.263554 | 3.428306  | -2.488018 |
| O  | 12.322647 | 4.746570  | -3.125037 |
| C  | 7.466582  | 2.808989  | -2.420823 |
| C  | 7.971200  | 1.495071  | -2.297952 |
| C  | 7.253591  | 0.420986  | -2.834423 |
| H  | 7.661297  | -0.574219 | -2.704912 |
| C  | 6.060367  | 0.614491  | -3.515208 |
| H  | 5.520126  | -0.227598 | -3.927941 |
| C  | 5.583290  | 1.912460  | -3.672363 |
| C  | 6.269251  | 2.990319  | -3.136509 |
| H  | 5.883344  | 3.991905  | -3.275089 |
| C  | 8.078230  | 4.003432  | -1.771949 |
| C  | 9.457513  | 4.296698  | -1.836081 |
| C  | 9.978061  | 5.459064  | -1.229771 |
| C  | 9.106893  | 6.337705  | -0.578628 |
| H  | 9.495663  | 7.225113  | -0.094347 |
| C  | 7.750955  | 6.053383  | -0.515387 |
| C  | 7.241279  | 4.899777  | -1.093368 |
| H  | 6.185725  | 4.677249  | -1.011144 |
| C  | 11.461222 | 5.729456  | -1.135062 |
| H  | 11.996370 | 4.886877  | -0.693355 |
| H  | 11.626219 | 6.607972  | -0.512046 |
| N  | 12.207437 | 5.972437  | -2.453478 |
| C  | 13.606248 | 6.464775  | -2.098107 |
| H  | 13.478452 | 7.384450  | -1.524586 |

|   |           |          |           |
|---|-----------|----------|-----------|
| H | 14.012495 | 5.696929 | -1.441053 |
| C | 14.511720 | 6.677185 | -3.298808 |
| H | 15.512754 | 6.906209 | -2.924902 |
| H | 14.194490 | 7.509834 | -3.929052 |
| H | 14.575361 | 5.781474 | -3.914542 |
| C | 11.471254 | 6.932467 | -3.371851 |
| H | 10.493764 | 6.478078 | -3.524604 |
| H | 12.005268 | 6.886501 | -4.318518 |
| C | 11.340444 | 8.361705 | -2.862924 |
| H | 10.748218 | 8.920670 | -3.591523 |
| H | 12.303872 | 8.866692 | -2.773347 |
| H | 10.817261 | 8.426093 | -1.907529 |
| H | 9.771019  | 1.887752 | -1.795125 |
| H | 11.131454 | 3.891672 | -2.768706 |
| H | 13.484195 | 3.620294 | -2.125051 |
| O | 13.997355 | 3.351081 | -1.340020 |
| H | 14.190657 | 2.415208 | -1.443507 |
| H | 12.627428 | 4.831560 | -4.948897 |
| O | 12.835776 | 5.093080 | -5.866576 |
| H | 12.431834 | 4.427564 | -6.430284 |

## Model B

51

scf done: -6317.585502

|    |           |           |           |
|----|-----------|-----------|-----------|
| Br | -5.520416 | -0.854302 | -1.143819 |
| Br | -0.291065 | 4.585950  | 0.036164  |
| O  | -0.932308 | -1.687540 | 2.732546  |
| O  | 0.909335  | -1.297978 | 0.822178  |
| O  | 3.252512  | -1.739183 | 0.155948  |
| C  | -1.821653 | -0.477771 | 0.806302  |
| C  | -1.915166 | -1.455067 | 1.822613  |
| C  | -3.089486 | -2.202109 | 1.964504  |
| H  | -3.133252 | -2.928747 | 2.766702  |
| C  | -4.167435 | -2.024600 | 1.109254  |
| H  | -5.067888 | -2.612535 | 1.231282  |

|   |           |           |           |
|---|-----------|-----------|-----------|
| C | -4.061784 | -1.089825 | 0.082738  |
| C | -2.913602 | -0.328747 | -0.068222 |
| H | -2.848878 | 0.389547  | -0.875221 |
| C | -0.671745 | 0.459191  | 0.658187  |
| C | 0.671859  | 0.029067  | 0.664530  |
| C | 1.726165  | 0.951371  | 0.500220  |
| C | 1.420863  | 2.301078  | 0.299666  |
| H | 2.220152  | 3.022319  | 0.180419  |
| C | 0.100438  | 2.726141  | 0.287894  |
| C | -0.935260 | 1.822770  | 0.473758  |
| H | -1.959549 | 2.170715  | 0.490894  |
| C | 3.185664  | 0.584473  | 0.656538  |
| H | 3.396800  | 0.190037  | 1.652325  |
| H | 3.792950  | 1.476315  | 0.504615  |
| N | 3.735833  | -0.495750 | -0.279238 |
| C | 5.251894  | -0.502568 | -0.130235 |
| H | 5.602550  | 0.486240  | -0.430038 |
| H | 5.426140  | -0.628126 | 0.937824  |
| C | 5.939538  | -1.603934 | -0.918381 |
| H | 7.000265  | -1.592290 | -0.656076 |
| H | 5.862933  | -1.466582 | -1.998228 |
| H | 5.536801  | -2.582252 | -0.659908 |
| C | 3.295018  | -0.303457 | -1.721703 |
| H | 2.207118  | -0.309427 | -1.689920 |
| H | 3.602323  | -1.210744 | -2.237273 |
| C | 3.817035  | 0.953320  | -2.403703 |
| H | 3.380393  | 0.991371  | -3.404568 |
| H | 4.901900  | 0.949426  | -2.524239 |
| H | 3.520901  | 1.869385  | -1.889221 |
| H | -0.068723 | -1.603553 | 2.289025  |
| H | 1.904745  | -1.533914 | 0.578597  |
| H | 3.972899  | -2.107793 | 1.871860  |
| O | 4.426065  | -1.870055 | 2.702633  |
| H | 4.296056  | -2.604219 | 3.309341  |
| H | 3.070457  | -3.162815 | -1.221731 |

|   |           |           |           |
|---|-----------|-----------|-----------|
| O | 2.848432  | -3.645110 | -2.032724 |
| H | 1.884177  | -3.558433 | -2.079589 |
| H | 0.099988  | -2.396292 | -0.693980 |
| O | 0.056438  | -2.792457 | -1.577901 |
| H | -0.828118 | -3.162493 | -1.655500 |

### Model C

51

scf done: -6317.582662

|    |           |           |           |
|----|-----------|-----------|-----------|
| Br | -5.458306 | -0.189571 | -1.728928 |
| Br | -0.088311 | 4.504577  | 0.954862  |
| O  | -1.070537 | -2.221494 | 1.934455  |
| O  | 0.864817  | -1.440385 | 0.338757  |
| O  | 3.192684  | -1.717432 | -0.571155 |
| C  | -1.844165 | -0.511869 | 0.378899  |
| C  | -2.019644 | -1.721311 | 1.082824  |
| C  | -3.214532 | -2.435983 | 0.974647  |
| H  | -3.317332 | -3.354704 | 1.540330  |
| C  | -4.245597 | -1.986970 | 0.160479  |
| H  | -5.165792 | -2.550867 | 0.080862  |
| C  | -4.065326 | -0.812060 | -0.562809 |
| C  | -2.889615 | -0.085629 | -0.459597 |
| H  | -2.767065 | 0.819813  | -1.039451 |
| C  | -0.653099 | 0.372728  | 0.521097  |
| C  | 0.673013  | -0.108678 | 0.478741  |
| C  | 1.766677  | 0.775188  | 0.586687  |
| C  | 1.525131  | 2.146312  | 0.713015  |
| H  | 2.355187  | 2.834839  | 0.813381  |
| C  | 0.223036  | 2.623166  | 0.752511  |
| C  | -0.853329 | 1.752051  | 0.668017  |
| H  | -1.862989 | 2.136091  | 0.728307  |
| C  | 3.191678  | 0.288973  | 0.711903  |
| H  | 3.299634  | -0.431678 | 1.524632  |
| H  | 3.843605  | 1.138090  | 0.914467  |
| N  | 3.782412  | -0.446652 | -0.497626 |

|   |           |           |           |
|---|-----------|-----------|-----------|
| C | 5.274949  | -0.620303 | -0.237094 |
| H | 5.691033  | 0.381828  | -0.119972 |
| H | 5.330893  | -1.136236 | 0.720602  |
| C | 6.004687  | -1.404992 | -1.313342 |
| H | 7.027087  | -1.574436 | -0.966470 |
| H | 6.061202  | -0.872067 | -2.264067 |
| H | 5.539192  | -2.373816 | -1.486977 |
| C | 3.501408  | 0.267409  | -1.808553 |
| H | 2.416414  | 0.343246  | -1.857983 |
| H | 3.816360  | -0.427085 | -2.584382 |
| C | 4.156774  | 1.632549  | -1.968432 |
| H | 3.828262  | 2.048547  | -2.923950 |
| H | 5.246314  | 1.575759  | -1.997834 |
| H | 3.860459  | 2.339730  | -1.192014 |
| H | -0.190706 | -2.108096 | 1.518836  |
| H | 1.808002  | -1.630496 | -0.022748 |
| H | 3.755492  | -2.733312 | 0.947443  |
| O | 4.148682  | -2.842692 | 1.833115  |
| H | 3.880626  | -3.709977 | 2.149698  |
| H | 3.261443  | -2.565285 | -2.223846 |
| O | 3.458484  | -2.835418 | -3.140985 |
| H | 2.739796  | -3.415028 | -3.408242 |
| H | -1.417267 | -3.796625 | 2.972837  |
| O | -1.699186 | -4.622307 | 3.398357  |
| H | -1.736961 | -4.422528 | 4.337881  |

## Sets of coordinates obtained at the $\omega$ B97XD/6-311++G(d,p) level of theory

### Compound 2

#### Model A

48

scf done: -6240.826831

|    |           |           |           |
|----|-----------|-----------|-----------|
| Br | 4.093683  | 2.276854  | -4.771849 |
| Br | 6.640192  | 7.296014  | 0.338113  |
| O  | 9.069263  | 1.206017  | -1.532115 |
| O  | 10.283171 | 3.396084  | -2.448922 |
| O  | 12.324117 | 4.726674  | -3.121703 |
| C  | 7.497425  | 2.828417  | -2.423434 |
| C  | 7.968065  | 1.514423  | -2.254650 |
| C  | 7.254356  | 0.448743  | -2.802033 |
| H  | 7.634138  | -0.552579 | -2.639370 |
| C  | 6.099410  | 0.656759  | -3.534869 |
| H  | 5.558976  | -0.181469 | -3.956372 |
| C  | 5.656108  | 1.957308  | -3.735067 |
| C  | 6.342136  | 3.026232  | -3.188604 |
| H  | 5.985287  | 4.035450  | -3.355855 |
| C  | 8.111718  | 4.016591  | -1.771256 |
| C  | 9.489691  | 4.282366  | -1.819755 |
| C  | 10.017845 | 5.435590  | -1.216695 |
| C  | 9.156144  | 6.330828  | -0.588366 |
| H  | 9.554053  | 7.217615  | -0.108374 |
| C  | 7.797347  | 6.073875  | -0.541562 |
| C  | 7.280177  | 4.925455  | -1.116647 |
| H  | 6.218799  | 4.719306  | -1.053094 |
| C  | 11.499791 | 5.690752  | -1.133055 |
| H  | 12.033442 | 4.839830  | -0.703746 |
| H  | 11.679393 | 6.563251  | -0.504756 |
| N  | 12.206634 | 5.937068  | -2.454111 |
| C  | 13.591074 | 6.451513  | -2.133825 |
| H  | 13.463235 | 7.370259  | -1.558203 |
| H  | 14.030244 | 5.693470  | -1.485151 |
| C  | 14.452271 | 6.678130  | -3.357825 |



|   |           |          |           |
|---|-----------|----------|-----------|
| H | 15.458727 | 6.930730 | -3.017805 |
| H | 14.092923 | 7.499998 | -3.979832 |
| H | 14.512338 | 5.780544 | -3.971589 |
| C | 11.439510 | 6.877948 | -3.345584 |
| H | 10.466066 | 6.408002 | -3.480387 |
| H | 11.951002 | 6.850308 | -4.306182 |
| C | 11.300048 | 8.293962 | -2.818816 |
| H | 10.662316 | 8.846999 | -3.511053 |
| H | 12.257751 | 8.815574 | -2.769225 |
| H | 10.822207 | 8.333634 | -1.838404 |
| H | 9.749867  | 1.875568 | -1.704525 |
| H | 11.139450 | 3.847234 | -2.745147 |
| H | 13.445832 | 3.639125 | -2.110145 |
| O | 13.928502 | 3.378855 | -1.306563 |
| H | 14.090279 | 2.438206 | -1.373556 |
| H | 12.599639 | 4.860941 | -4.915014 |
| O | 12.780549 | 5.159358 | -5.824007 |
| H | 12.342082 | 4.533096 | -6.399405 |

#### Model B

51

scf done: -6317.277158

|    |           |           |           |
|----|-----------|-----------|-----------|
| Br | -5.320206 | -0.870223 | -1.238296 |
| Br | -0.094978 | 4.579656  | -0.015538 |
| O  | -1.013985 | -1.491611 | 2.941602  |
| O  | 0.882026  | -1.264931 | 1.056506  |
| O  | 3.116070  | -1.853631 | 0.186834  |
| C  | -1.788152 | -0.381295 | 0.927194  |
| C  | -1.938531 | -1.309228 | 1.972137  |
| C  | -3.111059 | -2.059145 | 2.066832  |
| H  | -3.203409 | -2.754500 | 2.892189  |
| C  | -4.125088 | -1.928770 | 1.134835  |
| H  | -5.026451 | -2.522655 | 1.219476  |
| C  | -3.960973 | -1.038775 | 0.080584  |
| C  | -2.812577 | -0.274790 | -0.021682 |
| H  | -2.693889 | 0.413614  | -0.850086 |

|   |           |           |           |
|---|-----------|-----------|-----------|
| C | -0.618972 | 0.528024  | 0.787662  |
| C | 0.699855  | 0.050813  | 0.815391  |
| C | 1.778318  | 0.912906  | 0.567366  |
| C | 1.523218  | 2.257280  | 0.310333  |
| H | 2.348142  | 2.935789  | 0.124683  |
| C | 0.224821  | 2.737424  | 0.312106  |
| C | -0.838957 | 1.883345  | 0.547012  |
| H | -1.853052 | 2.263840  | 0.546803  |
| C | 3.215860  | 0.462052  | 0.623283  |
| H | 3.485698  | 0.072303  | 1.607318  |
| H | 3.863675  | 1.309555  | 0.398854  |
| N | 3.591405  | -0.656140 | -0.331712 |
| C | 5.098845  | -0.732197 | -0.375035 |
| H | 5.458823  | 0.235117  | -0.730049 |
| H | 5.404033  | -0.859248 | 0.663968  |
| C | 5.613805  | -1.868664 | -1.232817 |
| H | 6.693361  | -1.941872 | -1.087243 |
| H | 5.429218  | -1.709421 | -2.296658 |
| H | 5.162262  | -2.814575 | -0.935781 |
| C | 2.989807  | -0.472944 | -1.702483 |
| H | 1.911102  | -0.460956 | -1.550764 |
| H | 3.216842  | -1.389655 | -2.243367 |
| C | 3.460555  | 0.762977  | -2.444525 |
| H | 2.907653  | 0.816353  | -3.384192 |
| H | 4.523111  | 0.722219  | -2.692758 |
| H | 3.256779  | 1.685409  | -1.897255 |
| H | -0.132509 | -1.452096 | 2.539768  |
| H | 1.826404  | -1.570902 | 0.748931  |
| H | 3.979950  | -2.163158 | 1.798724  |
| O | 4.511190  | -1.899337 | 2.569983  |
| H | 4.426435  | -2.598305 | 3.217814  |
| H | 2.701357  | -3.220275 | -1.131093 |
| O | 2.389401  | -3.670367 | -1.927589 |
| H | 1.464916  | -3.398423 | -1.981624 |
| H | -0.040909 | -2.106787 | -0.493453 |

|   |           |           |           |
|---|-----------|-----------|-----------|
| O | -0.146096 | -2.265515 | -1.440608 |
| H | -1.091438 | -2.339502 | -1.581023 |

### Model C

51

scf done: -6317.270108

|    |           |           |           |
|----|-----------|-----------|-----------|
| Br | -5.371614 | -0.119916 | -1.786743 |
| Br | 0.066570  | 4.475800  | 0.929887  |
| O  | -1.140313 | -2.129430 | 2.018470  |
| O  | 0.817851  | -1.473272 | 0.392483  |
| O  | 3.120703  | -1.792734 | -0.572003 |
| C  | -1.839331 | -0.465889 | 0.401014  |
| C  | -2.058197 | -1.640743 | 1.136811  |
| C  | -3.263623 | -2.328472 | 1.023283  |
| H  | -3.403030 | -3.226693 | 1.614571  |
| C  | -4.258726 | -1.879663 | 0.171637  |
| H  | -5.191283 | -2.423068 | 0.087281  |
| C  | -4.034862 | -0.736097 | -0.582943 |
| C  | -2.845313 | -0.039028 | -0.473114 |
| H  | -2.683269 | 0.846828  | -1.075273 |
| C  | -0.627403 | 0.385098  | 0.545083  |
| C  | 0.674231  | -0.140434 | 0.516355  |
| C  | 1.790308  | 0.704642  | 0.625665  |
| C  | 1.594835  | 2.078714  | 0.735323  |
| H  | 2.448350  | 2.739989  | 0.832096  |
| C  | 0.313371  | 2.600997  | 0.758872  |
| C  | -0.786971 | 1.764752  | 0.675696  |
| H  | -1.786447 | 2.179589  | 0.721002  |
| C  | 3.193673  | 0.168828  | 0.737109  |
| H  | 3.280522  | -0.571363 | 1.535779  |
| H  | 3.876257  | 0.990925  | 0.952474  |
| N  | 3.729864  | -0.548927 | -0.488498 |
| C  | 5.213136  | -0.749121 | -0.278590 |
| H  | 5.652427  | 0.242266  | -0.152103 |
| H  | 5.293097  | -1.287972 | 0.665700  |

|   |           |           |           |
|---|-----------|-----------|-----------|
| C | 5.886548  | -1.516109 | -1.396381 |
| H | 6.918467  | -1.709403 | -1.096083 |
| H | 5.909924  | -0.959351 | -2.334976 |
| H | 5.395522  | -2.471809 | -1.573859 |
| C | 3.427342  | 0.194795  | -1.762850 |
| H | 2.342221  | 0.288368  | -1.783773 |
| H | 3.711942  | -0.479748 | -2.568508 |
| C | 4.100123  | 1.548461  | -1.892359 |
| H | 3.739256  | 2.014852  | -2.811025 |
| H | 5.185857  | 1.467659  | -1.971798 |
| H | 3.852788  | 2.221949  | -1.069905 |
| H | -0.258825 | -2.073560 | 1.607293  |
| H | 1.735211  | -1.691850 | 0.014793  |
| H | 3.654636  | -2.779328 | 0.923267  |
| O | 4.029129  | -2.877330 | 1.815246  |
| H | 3.734094  | -3.724590 | 2.148177  |
| H | 3.167993  | -2.563920 | -2.223943 |
| O | 3.350646  | -2.793493 | -3.151978 |
| H | 2.600306  | -3.306725 | -3.450537 |
| H | -1.619599 | -3.665321 | 3.025938  |
| O | -2.019796 | -4.451128 | 3.422815  |
| H | -2.129540 | -4.236479 | 4.348925  |

**References:**

- [1] Rospenk, M.; Koll, A.; Głowiak, T.; Sobczyk, L. *J. Mol. Struct.* **1989**, *195*, 33-41.
- [2] Wojciechowski, G.; Ratajczak-Sitarz, M.; Katrusiak, A.; Brzeziński, B. *J. Mol. Struct.* **2002**, *612*, 59-64.
